# Supplementary material for: Pulicaria glutinosa plant extract: a green and eco-friendly reducing agent for the preparation of highly reduced graphene oxide
Source: Royal Society of Chemistry journal article supplement (doi:10.1039/c4ra01296h), 2014-01-01
Supplement: c4ra01296h1.pdf [file c4ra01296h1.pdf]

Supplementary Material (ESI) for Green Chemistry

**Pulicaria Glutinosa Plant Extract: A Green and Eco-Friendly Reducing Agent for the Preparation of Highly Reduced Graphene Oxide**

Mujeeb Khan<sup>a</sup>, Abdulhadi H. Al-Marri<sup>a</sup>, Merajuddin Khan<sup>a</sup>, Nils Mohri<sup>b</sup>, Syed Farooq Adil<sup>a</sup>, Abdulrahman Al-Warthan<sup>a</sup>, Mohammed Rafiq H. Siddiqui<sup>a\*</sup>, Hamad Z. Alkathlan<sup>a</sup>, Rüdiger Berger<sup>c</sup>, Wolfgang Tremel<sup>b</sup>, Muhammad Nawaz Tahir<sup>b\*</sup>

<sup>a</sup> Department of Chemistry, College of Science, King Saud University, P. O. Box. 2455, Riyadh, 11451, Kingdom of Saudi Arabia. Tel +966 1 4676082, Fax +966 1 4676082, Email: [rafiqs@ksu.edu.sa](mailto:rafiqs@ksu.edu.sa)

<sup>b</sup> Institute of Inorganic and Analytical Chemistry, Johannes Gutenberg-University of Mainz, Mainz, Germany. Tel +49 6131 3925373, Fax +49 6131 3925605, Email: [tahir@uni-mainz.de](mailto:tahir@uni-mainz.de)

<sup>c</sup> Max Planck Institute for Polymer Research, Postfach 3148, D-55021, Mainz, Germany.

**Table of contents**

Fig. S 1. AFM height image of PE-HRG with the corresponding line profile at the edge..... 2

Fig. S 2. Dispersion images of PE-HRG-1, 2, 3 and CRG.....3

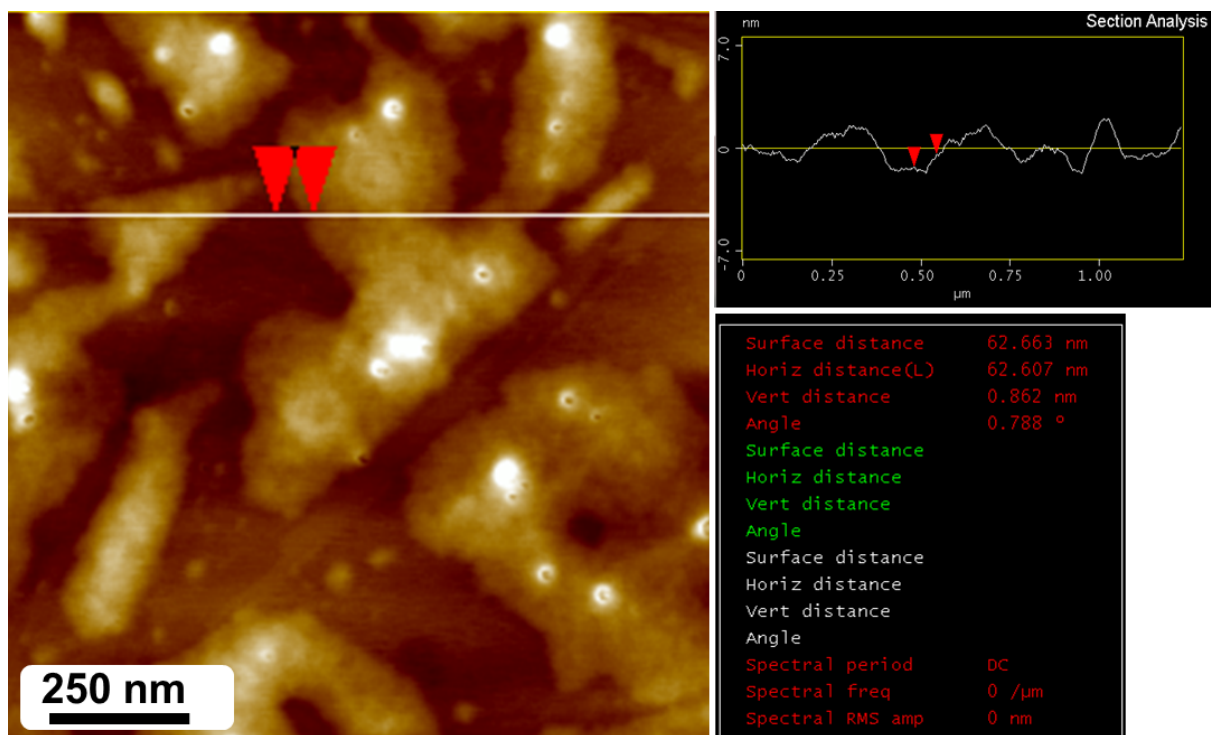

Fig. S1: AFM height image of PE-HRG with the corresponding line profile at the edge.

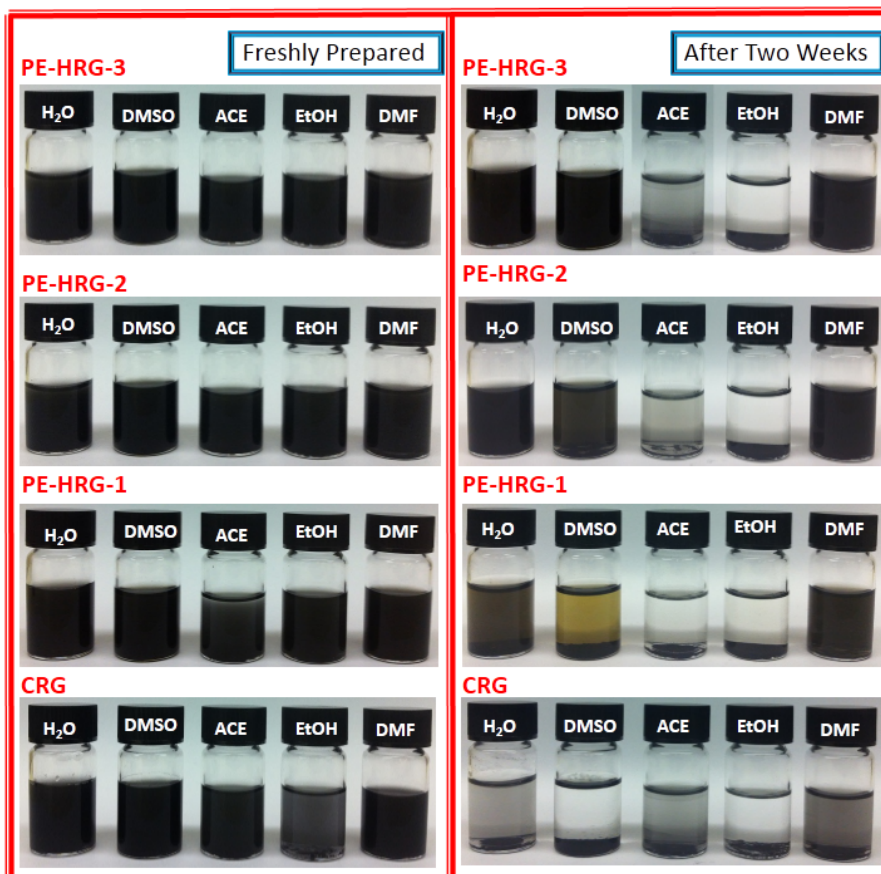

**Fig. S2:** Images of the dispersions of PE-HRG-1 (prepared with 10 ml of plant extract), PE-HRG-2 (prepared with 20 ml of plant extract), PE-HRG-3 (prepared with 50 ml of plant extract) and CRG (prepared with hydrazine hydrate).
